# Supplementary material
Source: PubMed Central journal article supplement (PMC10391028)

## **SUPPLEMENTARY MATERIALS**

### **Characterizing demographics, comorbidities, and costs of care among populations with Duchenne muscular dystrophy with Medicaid and commercial coverage**

Alexa C Klimchak, MSc; Shelagh M Szabo, MSc; Christina Qian, MSc; Evan Popoff, MSc; Susan Iannaccone, MD; and Katherine L Gooch, PhD

**Supplementary Table 1: ICD-9-CM, ICD-10-CM diagnostic codes, and CPT, HCPCS, ICD-10-PCS procedural codes for exclusion criteria**

**Supplementary Table 2: ICD-9-CM, ICD-10-CM diagnostic codes, and CPT, HCPCS, ICD-10-PCS procedural codes to identify comorbidities, key clinical outcomes**

**Supplementary Table 3: Sensitivity analyses cohort characteristics and resource use results, among the economic cohort (at least one year of follow-up)**

**Supplementary Table 4: Median (IQR) monthly resource use in the first year of follow-up in the commercial and Medicaid DMD and comparison cohorts with a minimum of one-year follow-up, stratified by baseline age**

**Supplementary Figure 1: Age distribution at baseline, among the commercial and Medicaid DMD cohorts**

**Supplementary Table 1: ICD-9-CM, ICD-10-CM diagnostic codes, and CPT, HCPCS, ICD-10-PCS procedural codes for exclusion criteria**

| Key clinical outcome                                              | Code type  | Codes                                                                                                                                                                                                                                                                                                                                                                                                                                                                                                                                                                                                                                                                                                                                                                                                                                                                                                                                                                                                                                                                                                                                                                                                                                                                                                                                                                                                                                                                                                                                                                                                                                                                                                                                                                                                                                                                                                                                                                                                                                                                                          |
|-------------------------------------------------------------------|------------|------------------------------------------------------------------------------------------------------------------------------------------------------------------------------------------------------------------------------------------------------------------------------------------------------------------------------------------------------------------------------------------------------------------------------------------------------------------------------------------------------------------------------------------------------------------------------------------------------------------------------------------------------------------------------------------------------------------------------------------------------------------------------------------------------------------------------------------------------------------------------------------------------------------------------------------------------------------------------------------------------------------------------------------------------------------------------------------------------------------------------------------------------------------------------------------------------------------------------------------------------------------------------------------------------------------------------------------------------------------------------------------------------------------------------------------------------------------------------------------------------------------------------------------------------------------------------------------------------------------------------------------------------------------------------------------------------------------------------------------------------------------------------------------------------------------------------------------------------------------------------------------------------------------------------------------------------------------------------------------------------------------------------------------------------------------------------------------------|
| Assisted ventilation                                              | ICD-9-CM   | V46.11-V46.14<br>Procedure: 93.90, 96.70, 96.71, 96.72                                                                                                                                                                                                                                                                                                                                                                                                                                                                                                                                                                                                                                                                                                                                                                                                                                                                                                                                                                                                                                                                                                                                                                                                                                                                                                                                                                                                                                                                                                                                                                                                                                                                                                                                                                                                                                                                                                                                                                                                                                         |
|                                                                   | ICD-10-CM  | Z99.11, Z99.12, J95.850                                                                                                                                                                                                                                                                                                                                                                                                                                                                                                                                                                                                                                                                                                                                                                                                                                                                                                                                                                                                                                                                                                                                                                                                                                                                                                                                                                                                                                                                                                                                                                                                                                                                                                                                                                                                                                                                                                                                                                                                                                                                        |
|                                                                   | ICD-10-PCS | 5A09357, 5A09358, 5A09359, 5A0935B, 5A0935Z, 5A09457, 5A09458, 5A09459, 5A0945B, 5A0945Z, 5A09557, 5A09558, 5A09559, 5A0955B, 5A0955Z, 5A19054, 5A1935Z, 5A1945Z, 5A1955Z                                                                                                                                                                                                                                                                                                                                                                                                                                                                                                                                                                                                                                                                                                                                                                                                                                                                                                                                                                                                                                                                                                                                                                                                                                                                                                                                                                                                                                                                                                                                                                                                                                                                                                                                                                                                                                                                                                                      |
|                                                                   | CPT        | 94002-94005, 94656, 94657, 99504, 94660, 94662                                                                                                                                                                                                                                                                                                                                                                                                                                                                                                                                                                                                                                                                                                                                                                                                                                                                                                                                                                                                                                                                                                                                                                                                                                                                                                                                                                                                                                                                                                                                                                                                                                                                                                                                                                                                                                                                                                                                                                                                                                                 |
|                                                                   | HCPCS      | A4611-A4613 (battery)<br>E0463, E0464 (volume control or negative pressure, stationary or portable)<br>E0465-E0466 (home, any type, used with non-invasive interface)<br>E0470-E0471 (respiratory assist device)                                                                                                                                                                                                                                                                                                                                                                                                                                                                                                                                                                                                                                                                                                                                                                                                                                                                                                                                                                                                                                                                                                                                                                                                                                                                                                                                                                                                                                                                                                                                                                                                                                                                                                                                                                                                                                                                               |
| Tracheostomy                                                      | ICD-9-CM   | 519.00, 519.01, 519.02, 519.09, V440, V550<br>Procedure: 31.1, 31.21, 31.29, 31.74, 31.72, 31.73, 97.37, 96.55, 97.23                                                                                                                                                                                                                                                                                                                                                                                                                                                                                                                                                                                                                                                                                                                                                                                                                                                                                                                                                                                                                                                                                                                                                                                                                                                                                                                                                                                                                                                                                                                                                                                                                                                                                                                                                                                                                                                                                                                                                                          |
|                                                                   | ICD-10-CM  | Z93.0, Z43.0, J95.00, J95.01, J95.02, J95.03, J95.04, J95.09                                                                                                                                                                                                                                                                                                                                                                                                                                                                                                                                                                                                                                                                                                                                                                                                                                                                                                                                                                                                                                                                                                                                                                                                                                                                                                                                                                                                                                                                                                                                                                                                                                                                                                                                                                                                                                                                                                                                                                                                                                   |
|                                                                   | ICD-10-PCS | 0B21XFZ, 0BP100Z, 0BP102Z, 0BP107Z, 0BP10CZ, 0BP10DZ, 0BP10FZ, 0BP10JZ, 0BP10KZ, 0BP1XFZ, 0B110F4, 0B110Z4, 0B113F4, 0B113Z4, 0B114F4, 0B114Z4                                                                                                                                                                                                                                                                                                                                                                                                                                                                                                                                                                                                                                                                                                                                                                                                                                                                                                                                                                                                                                                                                                                                                                                                                                                                                                                                                                                                                                                                                                                                                                                                                                                                                                                                                                                                                                                                                                                                                 |
|                                                                   | CPT        | 31600, 31601, 31603, 31605, 31610, 31613, 31614, 31820, 31825, 31830                                                                                                                                                                                                                                                                                                                                                                                                                                                                                                                                                                                                                                                                                                                                                                                                                                                                                                                                                                                                                                                                                                                                                                                                                                                                                                                                                                                                                                                                                                                                                                                                                                                                                                                                                                                                                                                                                                                                                                                                                           |
|                                                                   | HCPCS      | A4623, A4625, A4626, A4629, A7501-A7509, A7520, A7521, A7522, A7523- A7527, E0450, E0463, E0465, E0472, L8501, S8189                                                                                                                                                                                                                                                                                                                                                                                                                                                                                                                                                                                                                                                                                                                                                                                                                                                                                                                                                                                                                                                                                                                                                                                                                                                                                                                                                                                                                                                                                                                                                                                                                                                                                                                                                                                                                                                                                                                                                                           |
| Leg/ankle and foot/toe surgery (used for exclusion criteria only) | CPT        | 27870, 27871, 29891, 29892, 29894, 29895, 29897, 29898, 29899, 27613, 27614, 27615, 27616, 27618, 27619, 27620, 27625, 27626, 27630, 27632, 27634, 27635, 27637, 27638, 27640, 27641, 27645, 27646, 27647, 27750, 27756, 27758, 27759, 27760, 27766, 27769, 27780, 27784, 27786, 27792, 27808, 27814, 27816, 27822, 27823, 27824, 27826, 27827, 27828, 27829, 27832, 27846, 27848, 27860, 27601, 27602, 27603, 27604, 27605, 27606, 27607, 27610, 27612, 27648, 27752, 27762, 27781, 27788, 27810, 27818, 27825, 27830, 27831, 27840, 27842, 29581, 27650, 27652, 27654, 27656, 27658, 27659, 27664, 27665, 27675, 27676, 27680, 27681, 27685, 27686, 27687, 27690, 27691, 27692, 27695, 27696, 27698, 27700, 27702, 27703, 27704, 27705, 27707, 27709, 27712, 27715, 27720, 27722, 27724, 27725, 27726, 27727, 27730, 27732, 27734, 27740, 27742, 27745, 28705, 28715, 28725, 28730, 28735, 28737, 28740, 28750, 28755, 28760, 29904, 29905, 29906, 29907, 28039, 28041, 28043, 28045, 28046, 28047, 28050, 28052, 28054, 28060, 28062, 28070, 28072, 28080, 28086, 28088, 28090, 28092, 28100, 28102, 28103, 28104, 28106, 28107, 28108, 28110, 28111, 28112, 28113, 28114, 28116, 28118, 28119, 28120, 28122, 28124, 28126, 28130, 28140, 28150, 28153, 28160, 28171, 28173, 28175, 28400, 28406, 28415, 28420, 28430, 28436, 28445, 28450, 28456, 28465, 28470, 28476, 28485, 28490, 28496, 28505, 28510, 28525, 28530, 28531, 28546, 28555, 28576, 28585, 28606, 28615, 28636, 28645, 28666, 28675, 28001, 28002, 28003, 28005, 28008, 28010, 28011, 28020, 28022, 28024, 28035, 28055, 28405, 28435, 28455, 28475, 28495, 28515, 28540, 28545, 28570, 28575, 28600, 28605, 28630, 28635, 28660, 28665, 20696, 20697, 28200, 28202, 28208, 28210, 28220, 28222, 28225, 28226, 28230, 28232, 28234, 28238, 28240, 28250, 28260, 28261, 28262, 28264, 28270, 28272, 28280, 28285, 28286, 28288, 28290, 28292, 28293, 28294, 28296, 28297, 28298, 28299, 28300, 28302, 28304, 28305, 28306, 28307, 28308, 28309, 28310, 28312, 28313, 28315, 28320, 28322, 28340, 28341, 28344, 28345, 28360 |
| Ankle foot orthosis                                               | HCPCS      | L1900, L1902, L1904, L1906, L1907, L1910, L1920, L1930, L1932, L1940, L1945, L1950, L1951, L1971                                                                                                                                                                                                                                                                                                                                                                                                                                                                                                                                                                                                                                                                                                                                                                                                                                                                                                                                                                                                                                                                                                                                                                                                                                                                                                                                                                                                                                                                                                                                                                                                                                                                                                                                                                                                                                                                                                                                                                                               |
|                                                                   | ICD-9-CM   | V46.3, V53.8                                                                                                                                                                                                                                                                                                                                                                                                                                                                                                                                                                                                                                                                                                                                                                                                                                                                                                                                                                                                                                                                                                                                                                                                                                                                                                                                                                                                                                                                                                                                                                                                                                                                                                                                                                                                                                                                                                                                                                                                                                                                                   |
| Manual wheelchairs                                                | ICD-10-CM  | Z46.89, Z99.3                                                                                                                                                                                                                                                                                                                                                                                                                                                                                                                                                                                                                                                                                                                                                                                                                                                                                                                                                                                                                                                                                                                                                                                                                                                                                                                                                                                                                                                                                                                                                                                                                                                                                                                                                                                                                                                                                                                                                                                                                                                                                  |
|                                                                   | ICD-10-PCS | F01ZFEZ, F01ZFFZ, F01ZFUZ, F01ZFZZ, F07Z4DZ, F07Z4EZ, F07Z4FZ, F07Z4UZ, F07Z4YZ, F07Z4ZZ, F0FZ6EZ, F0FZ6FZ, F0FZ6UZ, F0FZ6ZZ                                                                                                                                                                                                                                                                                                                                                                                                                                                                                                                                                                                                                                                                                                                                                                                                                                                                                                                                                                                                                                                                                                                                                                                                                                                                                                                                                                                                                                                                                                                                                                                                                                                                                                                                                                                                                                                                                                                                                                   |
|                                                                   | CPT        | 97542                                                                                                                                                                                                                                                                                                                                                                                                                                                                                                                                                                                                                                                                                                                                                                                                                                                                                                                                                                                                                                                                                                                                                                                                                                                                                                                                                                                                                                                                                                                                                                                                                                                                                                                                                                                                                                                                                                                                                                                                                                                                                          |
|                                                                   | HCPCS      | E1088, E1130, E1140, E1150, E1160, E1161, E1240, E1250, E1260, E1270, K0001-K0009, K0015, K0017- K0020, K0037-K0047, K0050-K0053, K0056, K0065, K0069-K0073, K0077, K0105, K0195, K0669, E1020, E1028- E1031, E1035-E1039, E1050, E1060, E1070, E1083-E1087, E1089, E1090, E1092, E1093, E1100, E1110, E1170, E1171, E1172, E1180, E1190, E1195, E1200, E1220-E1229, E1231-E1238, E1240, E1250, E1260, E1270, E1280, E1285, E1290, E1295-E1298, E0950, E0951, E0952, E0955- E0961, E0966-E0971, E0973, E0974, E0978, E0980-E0982, E0985, E0988, E0990, E0992, E0994, E0995, E1009, E1011, E1014, E1015, E1017, K0108, E2213, E2607, E2620, E2624                                                                                                                                                                                                                                                                                                                                                                                                                                                                                                                                                                                                                                                                                                                                                                                                                                                                                                                                                                                                                                                                                                                                                                                                                                                                                                                                                                                                                                               |
| Power-assist wheelchair                                           | HCPCS      | E0986                                                                                                                                                                                                                                                                                                                                                                                                                                                                                                                                                                                                                                                                                                                                                                                                                                                                                                                                                                                                                                                                                                                                                                                                                                                                                                                                                                                                                                                                                                                                                                                                                                                                                                                                                                                                                                                                                                                                                                                                                                                                                          |
| Motorized wheelchairs                                             | HCPCS      | K0010-K0014, K0098, E0983, E0984, E1002-E1010, E1012, E1016, E1018, E1239, E2300, E2301, E2310-E2313, K0861, E2321-E2331, E2340-E2343, E2351, E2358-E2378, E2381-E2392, E2394-E2397, K0813-K0816, K0820-K0831, K0835-K0843, K0848-K0864, K0868-K0871, K0877-K0880, K0884-K0886, K0890, K0891, K0898, K0899                                                                                                                                                                                                                                                                                                                                                                                                                                                                                                                                                                                                                                                                                                                                                                                                                                                                                                                                                                                                                                                                                                                                                                                                                                                                                                                                                                                                                                                                                                                                                                                                                                                                                                                                                                                     |
| Nusinersen                                                        | NDC        | 4406005801                                                                                                                                                                                                                                                                                                                                                                                                                                                                                                                                                                                                                                                                                                                                                                                                                                                                                                                                                                                                                                                                                                                                                                                                                                                                                                                                                                                                                                                                                                                                                                                                                                                                                                                                                                                                                                                                                                                                                                                                                                                                                     |
|                                                                   | HCPCS      | J2326                                                                                                                                                                                                                                                                                                                                                                                                                                                                                                                                                                                                                                                                                                                                                                                                                                                                                                                                                                                                                                                                                                                                                                                                                                                                                                                                                                                                                                                                                                                                                                                                                                                                                                                                                                                                                                                                                                                                                                                                                                                                                          |

Abbreviations: CPT = Current Procedural Terminology; HCPCS=Healthcare Common Procedure Coding System; ICD-9-CM = International Classification of Diseases, Ninth Revision, Clinical Modification; ICD-10-CM = International Classification of Diseases, Tenth Revision, Clinical Modification; ICD-10-PCS = International Classification of Disease, 10th revision, Procedure Classification System; NDC = National Drug Code

**Supplementary Table 2: ICD-9-CM, ICD-10-CM diagnostic codes, and CPT, HCPCS, ICD-10-PCS procedural codes to identify comorbidities, key clinical outcomes**

| Key clinical outcome                     | Contributing diagnoses/ events                                       | Code type  | Codes                                                                                                                                                                                                                                                                                                                                                                                                                                                                                                                                                                                                                                            |
|------------------------------------------|----------------------------------------------------------------------|------------|--------------------------------------------------------------------------------------------------------------------------------------------------------------------------------------------------------------------------------------------------------------------------------------------------------------------------------------------------------------------------------------------------------------------------------------------------------------------------------------------------------------------------------------------------------------------------------------------------------------------------------------------------|
| LOA                                      | Manual wheelchairs                                                   | ICD-9-CM   | V46.3, V53.8                                                                                                                                                                                                                                                                                                                                                                                                                                                                                                                                                                                                                                     |
|                                          |                                                                      | ICD-10-CM  | Z46.9, Z99.3                                                                                                                                                                                                                                                                                                                                                                                                                                                                                                                                                                                                                                     |
|                                          |                                                                      | ICD-10-PCS | F01ZFEZ, F01ZFFZ, F01ZFUZ, F01ZFZZ, F07Z4DZ, F07Z4EZ, F07Z4FZ, F07Z4UZ, F07Z4YZ, F07Z4ZZ, F0FZ6EZ, F0FZ6FZ, F0FZ6UZ, F0FZ6ZZ                                                                                                                                                                                                                                                                                                                                                                                                                                                                                                                     |
|                                          |                                                                      | CPT        | 97542                                                                                                                                                                                                                                                                                                                                                                                                                                                                                                                                                                                                                                            |
|                                          |                                                                      | HCPCS      | E1088, E1130, E1140, E1150, E1160, E1161, E1240, E1250, E1260, E1270, K0001-K0009, K0015, K0017- K0020, K0037-K0047, K0050-K0053, K0056, K0065, K0069-K0073, K0077, K0105, K0195, K0669, E1020, E1028- E1031, E1035-E1039, E1050, E1060, E1070, E1083-E1087, E1089, E1090, E1092, E1093, E1100, E1110, E1170, E1171, E1172, E1180, E1190, E1195, E1200, E1220-E1229, E1231-E1238, E1240, E1250, E1260, E1270, E1280, E1285, E1290, E1295-E1298, E0950, E0951, E0952, E0955- E0961, E0966-E0971, E0973, E0974, E0978, E0980-E0982, E0985, E0988, E0990, E0992, E0994, E0995, E1009, E1011, E1014, E1015, E1017, K0108, E2213, E2607, E2620, E2624 |
|                                          |                                                                      | HCPCS      | E0986                                                                                                                                                                                                                                                                                                                                                                                                                                                                                                                                                                                                                                            |
|                                          |                                                                      | HCPCS      | E1230, K0800, K0801, K0802, K0806, K0807, K0808, K0812                                                                                                                                                                                                                                                                                                                                                                                                                                                                                                                                                                                           |
|                                          |                                                                      | HCPCS      | K0010-K0014, K0098, E0983, E0984, E1002-E1010, E1012, E1016, E1018, E1239, E2300, E2301, E2310-E2313, K0861, E2321-E2331, E2340-E2343, E2351, E2358-E2378, E2381-E2392, E2394-E2397, K0813-K0816, K0820-K0831, K0835-K0843, K0848-K0864, K0868-K0871, K0877-K0880, K0884-K0886, K0890, K0891, K0898, K0899                                                                                                                                                                                                                                                                                                                                       |
|                                          |                                                                      | ICD-9-CM   | 518.8, 518.8, 518.8                                                                                                                                                                                                                                                                                                                                                                                                                                                                                                                                                                                                                              |
|                                          |                                                                      | ICD-10-CM  | J96                                                                                                                                                                                                                                                                                                                                                                                                                                                                                                                                                                                                                                              |
| HCPCS                                    | A7034, A7035, A7037, A7038                                           |            |                                                                                                                                                                                                                                                                                                                                                                                                                                                                                                                                                                                                                                                  |
| ICD-9-CM                                 | 519.0, 519.0, 519.0, 519.1, V440, V550                               |            |                                                                                                                                                                                                                                                                                                                                                                                                                                                                                                                                                                                                                                                  |
| Respiratory insufficiency                | Respiratory failure                                                  | ICD-9-CM   | 518.8, 518.8, 518.8                                                                                                                                                                                                                                                                                                                                                                                                                                                                                                                                                                                                                              |
|                                          |                                                                      | ICD-10-CM  | J96                                                                                                                                                                                                                                                                                                                                                                                                                                                                                                                                                                                                                                              |
|                                          |                                                                      | HCPCS      | A7034, A7035, A7037, A7038                                                                                                                                                                                                                                                                                                                                                                                                                                                                                                                                                                                                                       |
|                                          |                                                                      | ICD-9-CM   | 519.0, 519.0, 519.0, 519.1, V440, V550                                                                                                                                                                                                                                                                                                                                                                                                                                                                                                                                                                                                           |
|                                          |                                                                      | ICD-10-CM  | Procedure: 31.1, 31.21, 31.3, 31.74, 31.7, 31.7, 97.4, 96.6, 97.2                                                                                                                                                                                                                                                                                                                                                                                                                                                                                                                                                                                |
|                                          |                                                                      | ICD-10-PCS | Z93.0, Z43.0, J95.0, J95.0, J95.0, J95.0, J95.0, J95.1                                                                                                                                                                                                                                                                                                                                                                                                                                                                                                                                                                                           |
|                                          |                                                                      | ICD-10-PCS | 0B21XFZ, 0BP100Z, 0BP102Z, 0BP107Z, 0BP10CZ, 0BP10DZ, 0BP10FZ, 0BP10JZ, 0BP10KZ, 0BP1XFZ, 0B110F4, 0B110Z4, 0B113F4, 0B113Z4, 0B114F4, 0B114Z4                                                                                                                                                                                                                                                                                                                                                                                                                                                                                                   |
|                                          |                                                                      | CPT        | 31600, 31601, 31603, 31605, 31610, 31613, 31614, 31820, 31825, 31830                                                                                                                                                                                                                                                                                                                                                                                                                                                                                                                                                                             |
|                                          |                                                                      | HCPCS      | A4623, A4625, A4626, A4629, A7501-A7509, A7520, A7521, A7522, A7523-A7527, E0450, E0463, E0465, E0472, L8501, S8189                                                                                                                                                                                                                                                                                                                                                                                                                                                                                                                              |
|                                          |                                                                      | ICD-9-CM   | V46.11-V46.1; Procedure: 93.9, 96.7, 96.7, 96.7                                                                                                                                                                                                                                                                                                                                                                                                                                                                                                                                                                                                  |
| Respiratory insufficiency                | Pulmonary management Tracheostomy*                                   | ICD-10-CM  | Z99.11, Z99.12, J95.90                                                                                                                                                                                                                                                                                                                                                                                                                                                                                                                                                                                                                           |
|                                          |                                                                      | ICD-10-PCS | 5A09357, 5A09358, 5A09359, 5A0935B, 5A0935Z, 5A09457, 5A09458, 5A09459, 5A0945B, 5A0945Z, 5A09557, 5A09558, 5A09559, 5A0955B, 5A0955Z, 5A19054, 5A1935Z, 5A1945Z, 5A1955Z                                                                                                                                                                                                                                                                                                                                                                                                                                                                        |
|                                          |                                                                      | CPT        | 94002-94005, 94656, 94657, 99504, 94660, 94662                                                                                                                                                                                                                                                                                                                                                                                                                                                                                                                                                                                                   |
|                                          |                                                                      | HCPCS      | A4611-A4613 (battery)                                                                                                                                                                                                                                                                                                                                                                                                                                                                                                                                                                                                                            |
|                                          |                                                                      | HCPCS      | E0463, E0464 (volume control or negative pressure, stationary or portable)                                                                                                                                                                                                                                                                                                                                                                                                                                                                                                                                                                       |
|                                          |                                                                      | HCPCS      | E0465-E0466 (home, any type, used with non-invasive interface)                                                                                                                                                                                                                                                                                                                                                                                                                                                                                                                                                                                   |
|                                          |                                                                      | HCPCS      | E0470-E0471 (respiratory assist device)                                                                                                                                                                                                                                                                                                                                                                                                                                                                                                                                                                                                          |
|                                          |                                                                      | ICD-9-CM   | 425.x                                                                                                                                                                                                                                                                                                                                                                                                                                                                                                                                                                                                                                            |
|                                          |                                                                      | ICD-10-CM  | I42.x                                                                                                                                                                                                                                                                                                                                                                                                                                                                                                                                                                                                                                            |
|                                          |                                                                      | NDC        | ACE inhibitors, ARBs, beta blockers, diuretics (spironolactone or eplerenone)                                                                                                                                                                                                                                                                                                                                                                                                                                                                                                                                                                    |
| Cardiomyopathy                           | Cardiomyopathy                                                       | ICD-9-CM   | 425.x                                                                                                                                                                                                                                                                                                                                                                                                                                                                                                                                                                                                                                            |
|                                          |                                                                      | ICD-10-CM  | I42.x                                                                                                                                                                                                                                                                                                                                                                                                                                                                                                                                                                                                                                            |
|                                          |                                                                      | ICD-9-CM   | 428.x                                                                                                                                                                                                                                                                                                                                                                                                                                                                                                                                                                                                                                            |
|                                          |                                                                      | ICD-10-CM  | I50                                                                                                                                                                                                                                                                                                                                                                                                                                                                                                                                                                                                                                              |
| Lung infections                          | Heart failure                                                        | ICD-9-CM   | 460-466, 480-487                                                                                                                                                                                                                                                                                                                                                                                                                                                                                                                                                                                                                                 |
|                                          |                                                                      | ICD-10-CM  | J00-06, J12-18, J20-22                                                                                                                                                                                                                                                                                                                                                                                                                                                                                                                                                                                                                           |
|                                          |                                                                      | ICD-9-CM   | 300.0, 300.3                                                                                                                                                                                                                                                                                                                                                                                                                                                                                                                                                                                                                                     |
| Neurologic/ neuropsychiatric comorbidity | Anxiety, dissociative or somatoform disorders (incl. anxiety or OCD) | ICD-9-CM   | 300.0, 300.3                                                                                                                                                                                                                                                                                                                                                                                                                                                                                                                                                                                                                                     |
|                                          |                                                                      | ICD-10-CM  | F41, F42                                                                                                                                                                                                                                                                                                                                                                                                                                                                                                                                                                                                                                         |
|                                          |                                                                      | ICD-9-CM   | 314.0x                                                                                                                                                                                                                                                                                                                                                                                                                                                                                                                                                                                                                                           |
|                                          |                                                                      | ICD-10-CM  | F90                                                                                                                                                                                                                                                                                                                                                                                                                                                                                                                                                                                                                                              |
|                                          |                                                                      | ICD-9-CM   | 299                                                                                                                                                                                                                                                                                                                                                                                                                                                                                                                                                                                                                                              |
| Neurologic/ neuropsychiatric comorbidity | Hyperkinetic syndrome of childhood (incl. ADHD)                      | ICD-10-CM  | F90                                                                                                                                                                                                                                                                                                                                                                                                                                                                                                                                                                                                                                              |
|                                          |                                                                      | ICD-9-CM   | 299                                                                                                                                                                                                                                                                                                                                                                                                                                                                                                                                                                                                                                              |
| Neurologic/ neuropsychiatric comorbidity | Pervasive development disorder                                       | ICD-9-CM   | 299                                                                                                                                                                                                                                                                                                                                                                                                                                                                                                                                                                                                                                              |
|                                          |                                                                      | ICD-10-CM  | F84                                                                                                                                                                                                                                                                                                                                                                                                                                                                                                                                                                                                                                              |

| Key clinical outcome                               | Contributing diagnoses/ events  | Code type        | Codes                                                                                                |
|----------------------------------------------------|---------------------------------|------------------|------------------------------------------------------------------------------------------------------|
| Non-neurologic/<br>neuropsychiatric<br>comorbidity | Depression/ depressive disorder | ICD-9-CM         | 296.2, 296.3, 311.x                                                                                  |
|                                                    | Epilepsy                        | ICD-10-CM        | F32, F33                                                                                             |
|                                                    |                                 | ICD-9-CM         | 345                                                                                                  |
|                                                    | Respiratory infectious disease  | ICD-10-CM        | G40                                                                                                  |
|                                                    |                                 | ICD-9-CM         | 46x, 48x                                                                                             |
|                                                    | Asthma                          | ICD-10-CM        | J0x, J1x, J2x                                                                                        |
|                                                    |                                 | ICD-9-CM         | 493                                                                                                  |
|                                                    | Fracture and osteoporosis       | ICD-10-CM        | J45                                                                                                  |
|                                                    |                                 | ICD-9-CM         | 733.0, 733.1, 733.9-733.98, 800-829, E887                                                            |
|                                                    |                                 | ICD-10-CM<br>NDC | M80, M81, M84.4, M84.3, S02, S12, S22, S32, S42, S52, S62, S72, S82, S92<br>NDCs for bisphosphonates |
|                                                    | Diabetes mellitus               | ICD-9-CM         | 250.x0, 250.x2                                                                                       |
|                                                    |                                 | ICD-10-CM        | E11.x                                                                                                |
|                                                    | Cataract                        | ICD-9-CM         | 366.x                                                                                                |
|                                                    | Cystic fibrosis                 | ICD-10-CM        | H26.x, H28                                                                                           |
| ICD-9-CM                                           |                                 | 277.0x           |                                                                                                      |
|                                                    | ICD-10-CM                       | E84.x            |                                                                                                      |

Abbreviations: CPT = Current Procedural Terminology; HCPCS=Healthcare Common Procedure Coding System; ICD-9-CM = International Classification of Diseases, Ninth Revision, Clinical Modification; ICD-10-CM = International Classification of Diseases, Tenth Revision, Clinical Modification; ICD-10-PCS = International Classification of Disease, 10th revision, Procedure Classification System; LOA=loss of ambulation; NDC = National Drug Code

**Supplementary Table 3: Sensitivity analyses cohort characteristics and resource use results, among the economic cohort (at least one year of follow-up)**

|                                                                          | DMD primary economic cohort<br>(n=1,420) | Commercial<br>DMD definition exploratory cohorts |                                                                | DMD primary economic cohort<br>(n=1,722) | Medicaid<br>DMD definition exploratory cohorts |                                                                |
|--------------------------------------------------------------------------|------------------------------------------|--------------------------------------------------|----------------------------------------------------------------|------------------------------------------|------------------------------------------------|----------------------------------------------------------------|
|                                                                          |                                          | ≥1 specialist diagnoses<br>(n=1,280)             | Excluding myoneural disorder and similar diseases<br>(n=1,339) |                                          | ≥1 specialist diagnoses<br>(n=808)             | Excluding myoneural disorder and similar diseases<br>(n=1,618) |
| Years of follow-up per person, median (IQR)                              | 2.7 (1.7 to 4.0)                         | 2.7 (1.7 to 4.1)                                 | 2.6 (1.7 to 4.0)                                               | 3.6 (2.1 to 4.7)                         | 3.5 (1.9 to 4.9)                               | 3.5 (2.1 to 4.7)                                               |
| Age at index date, median (IQR)                                          | 15.0 (9.0 to 21.0)                       | 15.0 (9.0 to 20.0)                               | 15.0 (9.0 to 21.0)                                             | 14.0 (9.0 to 20.0)                       | 14.0 (9.0 to 18.0)                             | 14.0 (9.0 to 20.0)                                             |
| Elixhauser (unweighted), median (IQR)                                    | 2.0 (1.0 to 3.0)                         | 2.0 (1.0 to 4.0)                                 | 2.0 (1.0 to 3.0)                                               | 2.0 (1.0 to 4.0)                         | 2.0 (1.0 to 4.0)                               | 2.0 (1.0 to 4.0)                                               |
| Number of distinct medications dispensed, median (IQR)                   | 2.4 (1.5 to 4.4)                         | 2.4 (1.5 to 4.4)                                 | 2.3 (1.4 to 4.3)                                               | 3.5 (1.9 to 6.6)                         | 3.3 (1.8 to 6.0)                               | 3.3 (1.8 to 6.4)                                               |
| <b>Hospitalizations</b>                                                  |                                          |                                                  |                                                                |                                          |                                                |                                                                |
| Number (%) of patients with any hospitalization                          | 368 (25.9)                               | 329 (25.7)                                       | 326 (24.3)                                                     | 535 (31.1)                               | 251 (31.1)                                     | 493 (30.5)                                                     |
| Number of hospitalizations among those > 1 hospitalization, median (IQR) | 0.0 (0.0 to 0.1)                         | 0.0 (0.0 to 0.1)                                 | 0.0 (0.0 to 0.1)                                               | 0.0 (0.0 to 0.1)                         | 0.0 (0.0 to 0.1)                               | 0.0 (0.0 to 0.1)                                               |
| Length of stay (days), median (IQR)                                      | 4.0 (2.0 to 7.0)                         | 4.0 (2.0 to 7.3)                                 | 4.0 (2.0 to 7.0)                                               | 4.3 (2.0 to 8.2)                         | 4.3 (2.5 to 9.0)                               | 4.0 (2.0 to 8.0)                                               |
| <b>ER visits</b>                                                         |                                          |                                                  |                                                                |                                          |                                                |                                                                |
| Number (%) of patients with any ER                                       | 679 (47.8)                               | 612 (47.8)                                       | 612 (47.8)                                                     | 1,113 (64.6)                             | 510 (63.1)                                     | 1,043 (64.5)                                                   |
| Number of ER visits amongst those with ≥ 1 ER visit, median (IQR)        | 0.1 (0.0 to 0.1)                         | 0.1 (0.0 to 0.1)                                 | 0.1 (0.0 to 0.1)                                               | 0.1 (0.0 to 0.1)                         | 0.1 (0.0 to 0.1)                               | 0.1 (0.0 to 0.1)                                               |
| <b>Outpatient visits</b>                                                 |                                          |                                                  |                                                                |                                          |                                                |                                                                |
| Number of outpatient visits, median (IQR)                                | 1.4 (0.7 to 3.1)                         | 1.4 (0.7 to 3.0)                                 | 1.4 (0.7 to 3.0)                                               | 3.8 (1.3 to 13.9)                        | 3.4 (1.2 to 12.3)                              | 3.5 (1.2 to 13.3)                                              |
| Number of patients (%) with >1 GP visit                                  | 916 (64.5%)                              | 820 (64.1%)                                      | 856 (63.9%)                                                    | 1,179 (68.5%)                            | 501 (62.0%)                                    | 1,108 (68.5%)                                                  |
| Number of GP visits, median (IQR)                                        | 0.1 (0.0 to 0.2)                         | 0.0 (0.0 to 0.2)                                 | 0.1 (0.0 to 0.2)                                               | 0.1 (0.0 to 0.4)                         | 0.1 (0.0 to 0.3)                               | 0.1 (0.0 to 0.4)                                               |
| Number of patients (%) with >1 specialist visit                          | 1,378 (97.0%)                            | 1,280 (100.0%)                                   | 1,299 (97.0%)                                                  | 1,293 (75.1%)                            | 800 (99.0%)                                    | 1,204 (74.4%)                                                  |
| Number of specialist visits, median (IQR)                                | 0.5 (0.3 to 0.9)                         | 0.5 (0.3 to 0.9)                                 | 0.5 (0.3 to 0.9)                                               | 0.2 (0.0 to 0.5)                         | 0.4 (0.2 to 0.7)                               | 0.2 (0.0 to 0.5)                                               |
| <b>Total costs</b>                                                       |                                          |                                                  |                                                                |                                          |                                                |                                                                |
| Monthly cost per person (\$), median (IQR)                               | 1,883.3 (656.8 to 6,795.9)               | 1,902.6 (669.8 to 6,795.9)                       | 1,822.7 (622.1 to 6,569.4)                                     | 1,734.9 (367.3 to 5,281.0)               | 1,969.4 (656.6 to 5,298.1)                     | 1,665.4 (354.8 to 5,010.6)                                     |

Abbreviations: GP = general practitioner; IQR = interquartile range  
Data reported as median (IQR), unless otherwise stated

**Supplementary Table 4: Median (IQR) monthly resource use in the first year of follow-up in the commercial and Medicaid DMD and comparison cohorts with a minimum of one-year follow-up, stratified by baseline age**

|                                                                        | Commercial              |                      |                  |                  |                   |                   |                  | Medicaid                |                      |                  |                  |                   |                   |                   |
|------------------------------------------------------------------------|-------------------------|----------------------|------------------|------------------|-------------------|-------------------|------------------|-------------------------|----------------------|------------------|------------------|-------------------|-------------------|-------------------|
|                                                                        | All patients<br>n=1,420 | Baseline age (years) |                  |                  |                   |                   |                  | All patients<br>n=1,722 | Baseline age (years) |                  |                  |                   |                   |                   |
|                                                                        |                         | 0 to 3<br>n=59       | 4 to 7<br>n=184  | 8 to 13<br>n=378 | 14 to 17<br>n=259 | 18 to 25<br>n=399 | 26+<br>n=141     |                         | 0 to 3<br>n=91       | 4 to 7<br>n=235  | 8 to 13<br>n=468 | 14 to 17<br>n=326 | 18 to 25<br>n=458 | 26+<br>n=144      |
| <b>Medications</b>                                                     |                         |                      |                  |                  |                   |                   |                  |                         |                      |                  |                  |                   |                   |                   |
| Number of distinct medications dispensed*                              | 1.5 (1.0 to 2.4)        | 1.0 (1.0 to 1.7)     | 1.3 (1.0 to 1.8) | 1.4 (1.0 to 2.0) | 1.7 (1.0 to 2.8)  | 1.9 (1.0 to 2.8)  | 2.0 (1.0 to 3.4) | 2.0 (1.1 to 3.1)        | 1.5 (1.0 to 2.0)     | 1.6 (1.0 to 2.0) | 1.9 (1.0 to 2.9) | 2.3 (1.3 to 3.8)  | 2.2 (1.2 to 3.7)  | 2.6 (1.3 to 4.0)  |
| <b>Inpatient visits</b>                                                |                         |                      |                  |                  |                   |                   |                  |                         |                      |                  |                  |                   |                   |                   |
| Number of people with any hospitalization, n(%)                        | 186 (13.1%)             | 3 (5.1%)             | 15 (8.2%)        | 36 (9.5%)        | 43 (16.6%)        | 63 (15.8%)        | 26 (18.4%)       | 239 (13.9%)             | 15 (16.5%)           | 22 (9.4%)        | 48 (10.3%)       | 52 (16.0%)        | 74 (16.2%)        | 28 (19.4%)        |
| Number of hospitalizations among those with at least 1 admission       | 0.1 (0.1 to 0.2)        | 0.1 (0.1 to 0.2)     | 0.1 (0.1 to 0.1) | 0.1 (0.1 to 0.1) | 0.1 (0.1 to 0.2)  | 0.1 (0.1 to 0.2)  | 0.1 (0.1 to 0.1) | 0.1 (0.1 to 0.2)        | 0.1 (0.1 to 0.2)     | 0.1 (0.1 to 0.1) | 0.1 (0.1 to 0.1) | 0.1 (0.1 to 0.2)  | 0.1 (0.1 to 0.2)  | 0.2 (0.1 to 0.2)  |
| Length of stay per hospitalization                                     | 3.5 (2.0 to 6.5)        | 1.0 (1.0 to 5.5)     | 3.0 (1.0 to 4.0) | 3.0 (1.5 to 6.0) | 6.0 (3.0 to 8.0)  | 4.0 (2.0 to 7.0)  | 3.0 (1.7 to 4.5) | 3.5 (2.0 to 7.0)        | 2.0 (2.0 to 3.3)     | 2.0 (1.0 to 5.0) | 3.0 (2.0 to 4.5) | 4.3 (2.0 to 9.0)  | 4.0 (3.0 to 8.0)  | 4.3 (2.5 to 9.0)  |
| <b>ER visits</b>                                                       |                         |                      |                  |                  |                   |                   |                  |                         |                      |                  |                  |                   |                   |                   |
| Number of people with any ER, n(%)                                     | 377 (26.5%)             | 16 (27.1%)           | 45 (24.5%)       | 89 (23.5%)       | 62 (23.9%)        | 125 (31.3%)       | 40 (28.4%)       | 653 (37.9%)             | 56 (61.5%)           | 104 (44.3%)      | 163 (34.8%)      | 109 (33.4%)       | 161 (35.2%)       | 60 (41.7%)        |
| Number of ER visits among those with at least 1 visit                  | 0.1 (0.1 to 0.2)        | 0.1 (0.1 to 0.1)     | 0.1 (0.1 to 0.2) | 0.1 (0.1 to 0.2) | 0.1 (0.1 to 0.2)  | 0.1 (0.1 to 0.2)  | 0.1 (0.1 to 0.2) | 0.1 (0.1 to 0.3)        | 0.2 (0.1 to 0.3)     | 0.1 (0.1 to 0.2) | 0.1 (0.1 to 0.2) | 0.1 (0.1 to 0.2)  | 0.1 (0.1 to 0.3)  | 0.2 (0.1 to 0.3)  |
| <b>Outpatient visits</b>                                               |                         |                      |                  |                  |                   |                   |                  |                         |                      |                  |                  |                   |                   |                   |
| Number of outpatient visits                                            | 1.0 (0.0 to 3.0)        | 1.0 (0.0 to 3.0)     | 1.0 (0.0 to 3.0) | 1.0 (0.0 to 2.0) | 1.0 (0.0 to 3.0)  | 1.0 (0.0 to 3.0)  | 1.0 (0.0 to 4.0) | 3.0 (1.0 to 10.0)       | 2.0 (1.0 to 4.0)     | 3.0 (1.0 to 6.0) | 3.0 (1.0 to 6.0) | 3.0 (1.0 to 11.0) | 5.0 (0.0 to 19.0) | 5.0 (1.0 to 22.0) |
| Patients who have at least one GP visit during the study, n(%)         | 664 (46.8%)             | 20 (33.9%)           | 59 (32.1%)       | 166 (43.9%)      | 116 (44.8%)       | 221 (55.4%)       | 82 (58.2%)       | 1023 (59.4%)            | 51 (56.0%)           | 146 (62.1%)      | 254 (54.3%)      | 177 (54.3%)       | 295 (64.4%)       | 100 (69.4%)       |
| Number of GP visits among those with at least 1 visit                  | 0.2 (0.1 to 0.4)        | 0.2 (0.1 to 0.3)     | 0.2 (0.1 to 0.3) | 0.2 (0.1 to 0.4) | 0.2 (0.1 to 0.4)  | 0.2 (0.1 to 0.3)  | 0.2 (0.1 to 0.3) | 0.4 (0.2 to 0.8)        | 0.7 (0.4 to 1.3)     | 0.5 (0.3 to 0.8) | 0.4 (0.2 to 0.8) | 0.4 (0.3 to 0.8)  | 0.3 (0.2 to 0.6)  | 0.3 (0.2 to 0.7)  |
| Patients who have at least one specialist visit during the study, n(%) | 1349 (95.0%)            | 58 (98.3%)           | 180 (97.8%)      | 359 (95.0%)      | 251 (96.9%)       | 375 (94.0%)       | 126 (89.4%)      | 1044 (60.6%)            | 51 (56.0%)           | 164 (69.8%)      | 331 (70.7%)      | 206 (63.2%)       | 225 (49.1%)       | 67 (46.5%)        |
| Number of specialist visits among those with ≥ 1 specialist visit      | 0.6 (0.3 to 0.9)        | 0.6 (0.4 to 1.0)     | 0.7 (0.4 to 1.1) | 0.6 (0.3 to 0.9) | 0.6 (0.3 to 1.0)  | 0.5 (0.3 to 0.8)  | 0.6 (0.3 to 1.0) | 0.4 (0.2 to 0.8)        | 0.6 (0.2 to 1.0)     | 0.3 (0.2 to 0.8) | 0.4 (0.2 to 0.8) | 0.4 (0.2 to 0.8)  | 0.3 (0.2 to 0.7)  | 0.3 (0.2 to 0.8)  |

Abbreviations: GP = general practitioner; IQR = interquartile range  
Data reported as median (IQR), unless otherwise state

**Supplementary Figure 1: Age distribution at baseline, among the commercial and Medicaid DMD cohorts**

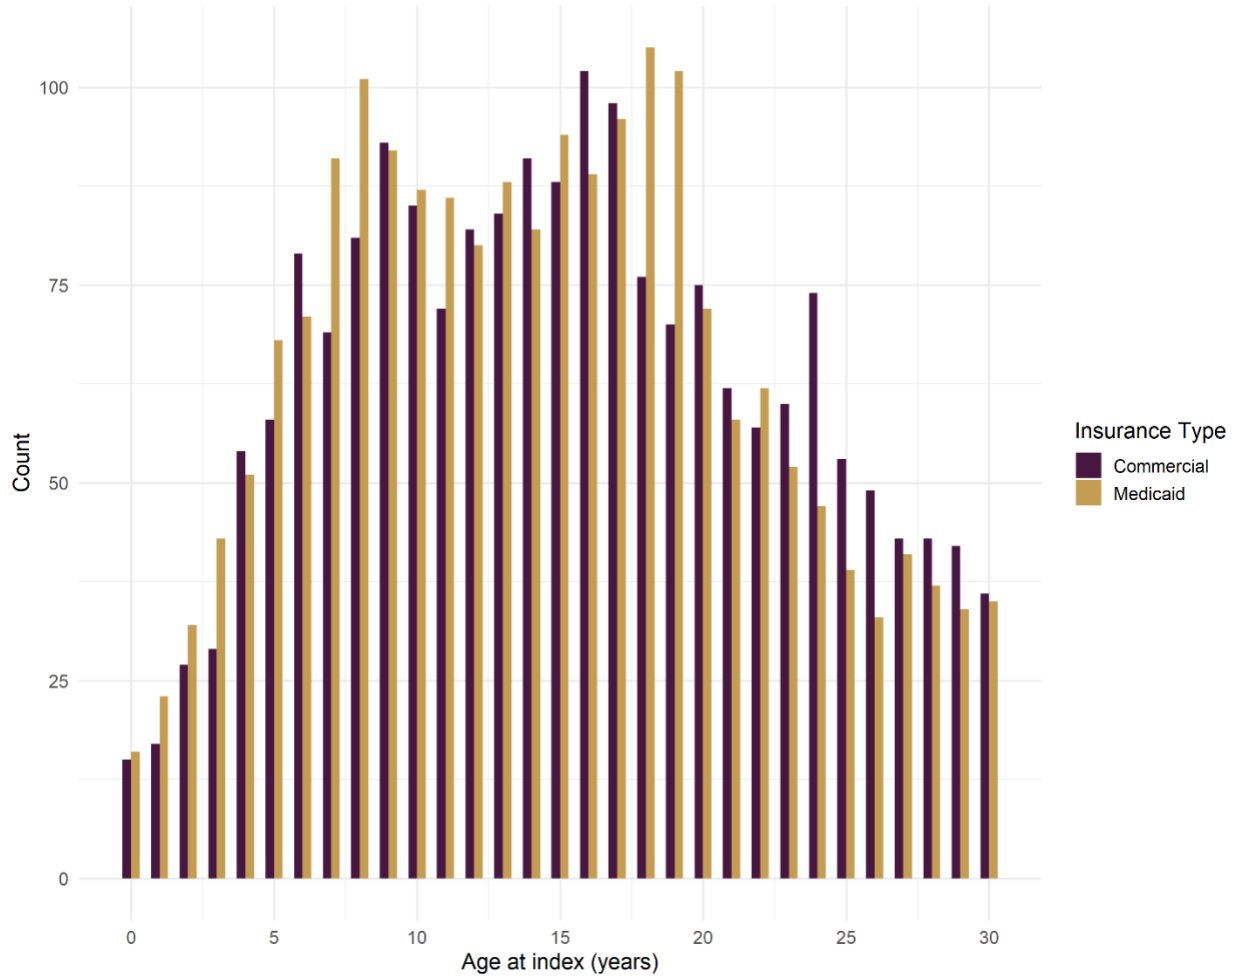

Supplement: jmcp.2021.27.10.1426_s001.pdf [file jmcp.2021.27.10.1426_s001.pdf]
